# Supplementary figures and images for: The Association between Daily Total Dietary Nutrient Intake and Recent Glycemic Control States of Non-Pregnant Adults 20+ Years Old from NHANES 1999–2018 (Except for 2003–2004)
Source: MDPI journal article supplement (doi:10.3390/nu13114168), 2021-11-21

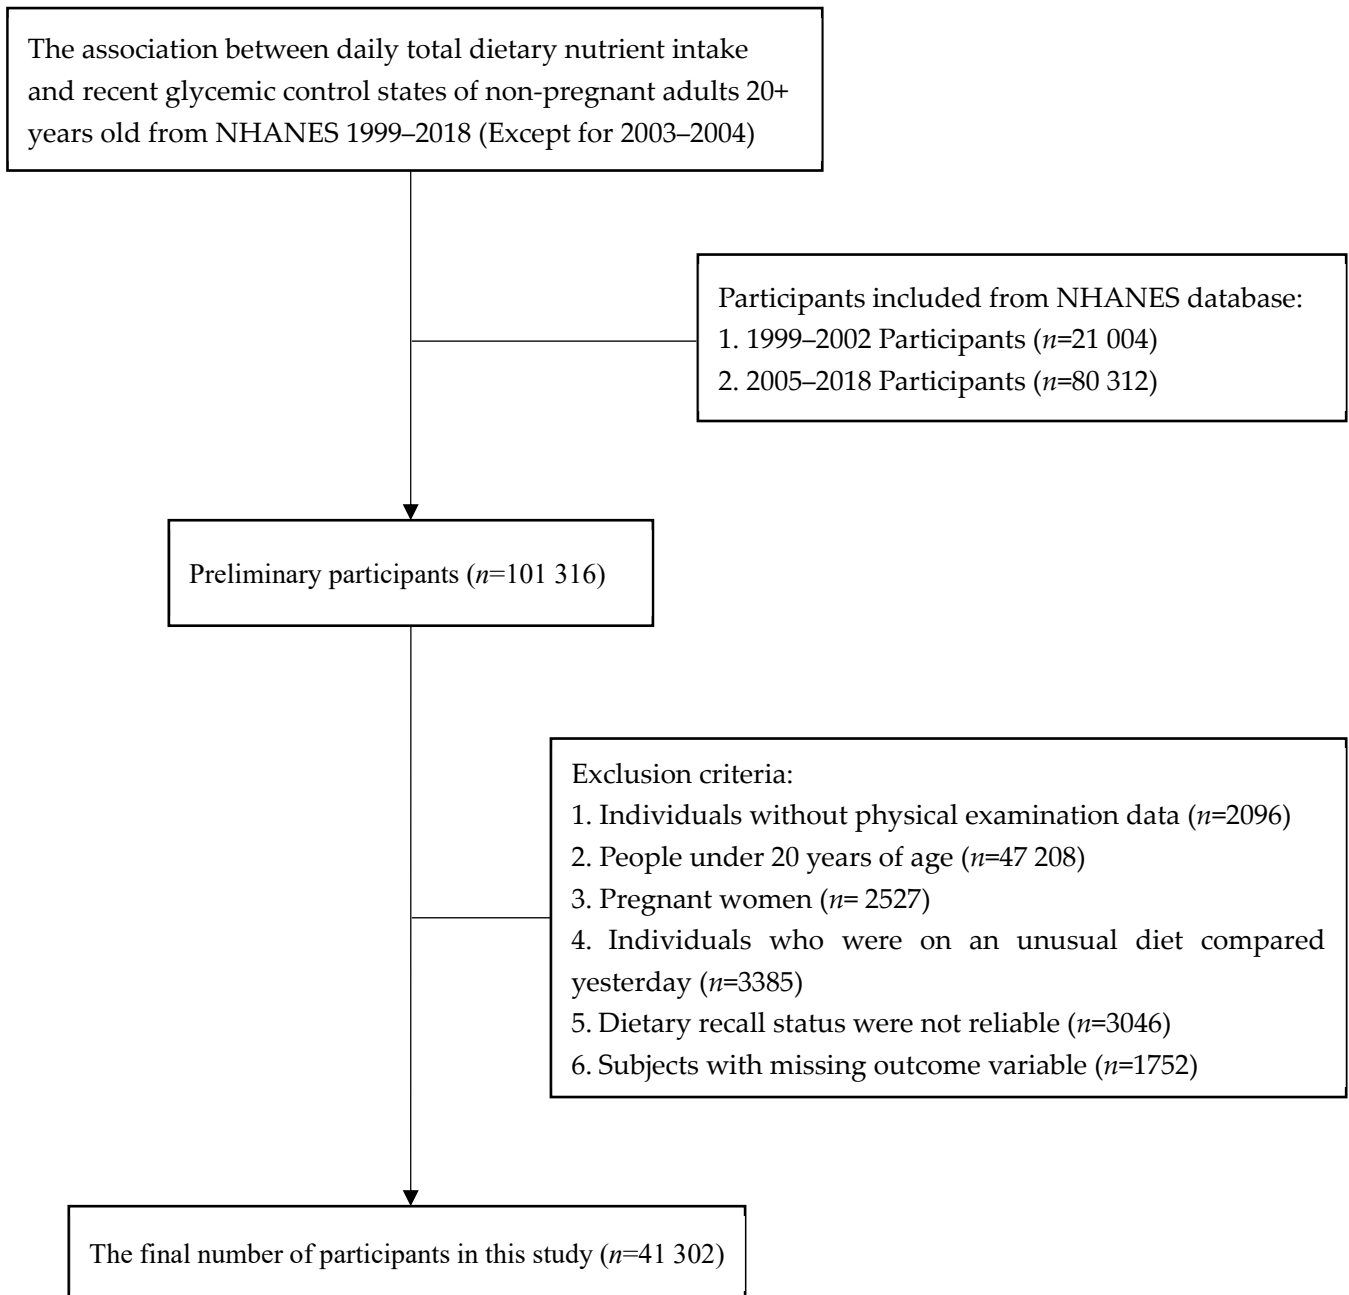

**Supplementary Figure S1.** Participant flow chart.

Supplement: s1 [file s1]
